# Supplementary material for: Leaf wax n -alkane patterns and compound-specific δ 13 C of plants and topsoils from semi-arid and arid Mongolia
Source: Copernicus journal article supplement (doi:10.5194/bg-17-567-2020), 2020-02-05
Supplement: Supplementary file 1 [file bg-17-567-2020-supplement.zip]

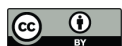

## *Supplement of*

# **Leaf wax *n*-alkane patterns and compound-specific $\delta^{13}\text{C}$ of plants and topsoils from semi-arid and arid Mongolia**

**Julian Struck et al.**

*Correspondence to:* Julian Struck ([julian.struck@uni-jena.de](mailto:julian.struck@uni-jena.de))

- [bg-17-567-2020-supplement-title-page.pdf](#)
- [Suppl.Mat.xlsx](#)

The copyright of individual parts of the supplement might differ from the CC BY 4.0 License.
